# Supplementary figures and images for: Fiber optic hydrogen sensor based on a Fabry–Perot interferometer with a fiber Bragg grating and a nanofilm
Source: Royal Society of Chemistry journal article supplement (doi:10.1039/d1lc00012h), 2021-01-01

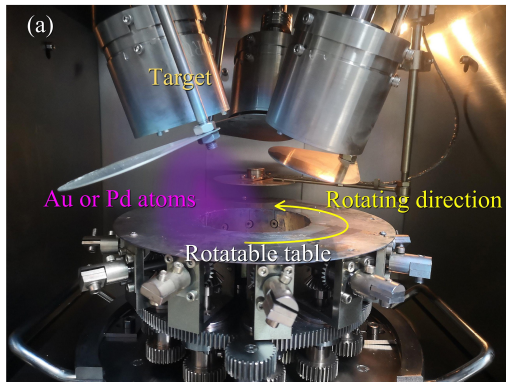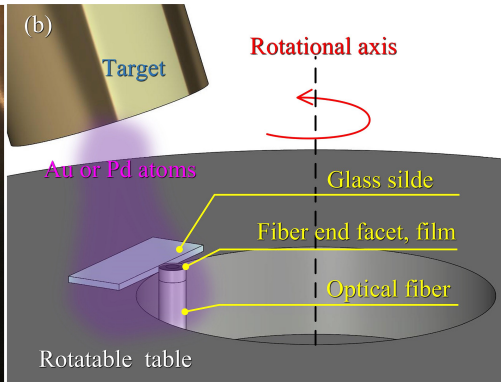

Supplement: d1lc00012h2.pdf [file d1lc00012h2.pdf]

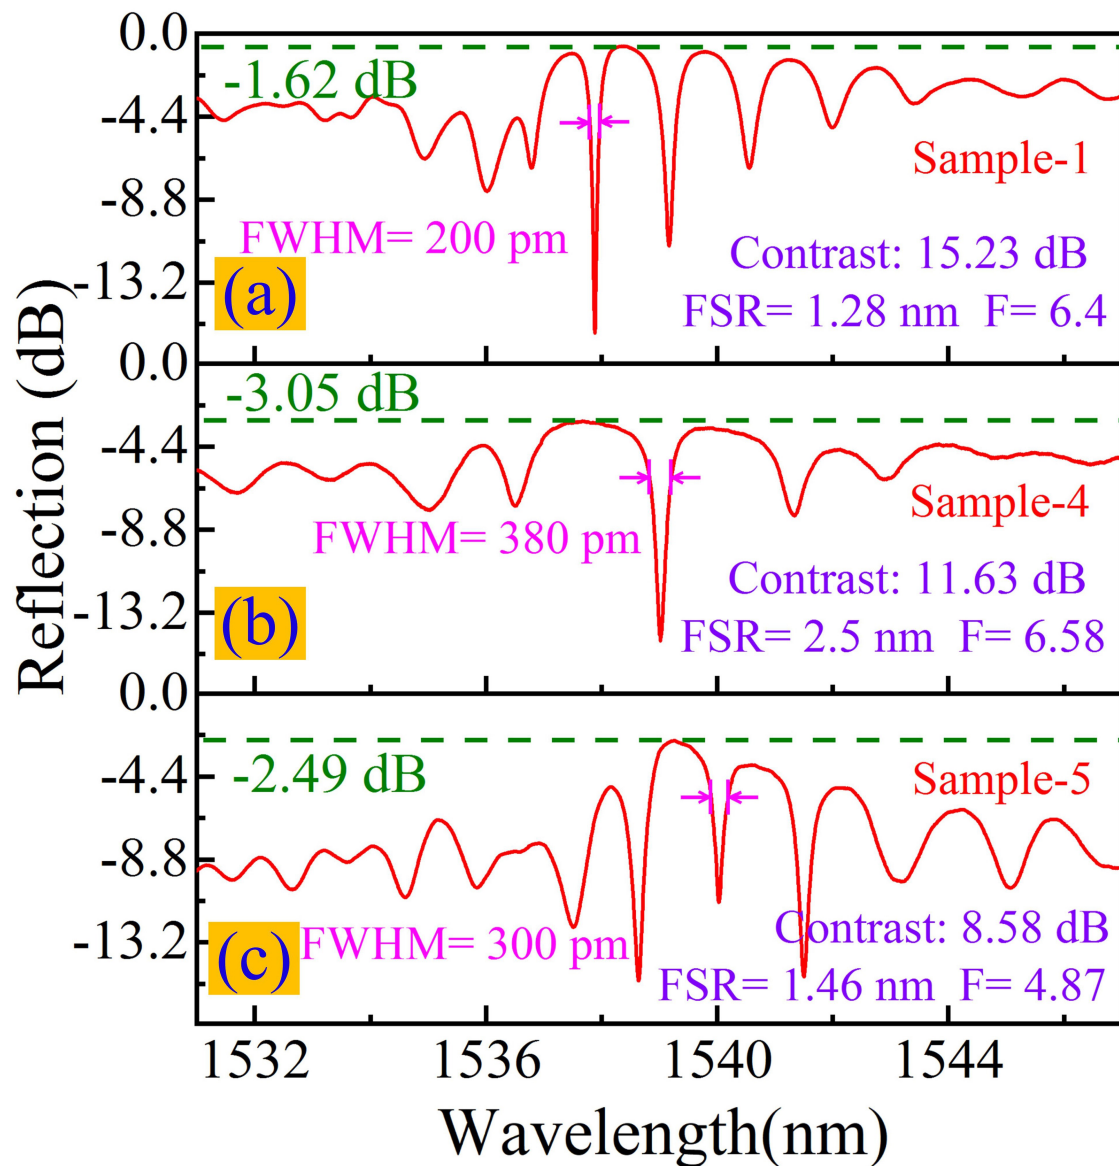

Supplement: d1lc00012h4.pdf [file d1lc00012h4.pdf]
